# Supplementary material
Source: publisher site journal article supplement (https://www.dovepress.com/get_supplementary_file.php?f=350856.docx)
Supplement: Supplementary file 1 [file get_supplementary_file.php]

**Supplementary materials**

Table S1. Percentage of missing data in variables of interest

| Variables | Missing value (n=1685) | Percent (%) |
| --- | --- | --- |
| Age (years) | 0 | 0 |
| Gender (males) | 0 | 0 |
| BMI (kg/m2) | 91 | 5.4 |
| Ethnicity | 0 | 0 |
| Tobacco use | 0 | 0 |
| Admission type | 0 | 0 |
| Hypertension | 0 | 0 |
| Coronary atherosclerosis | 0 | 0 |
| Diabetes | 0 | 0 |
| COPD | 0 | 0 |
| Asthma | 0 | 0 |
| Acute kidney failure | 0 | 0 |
| Tumor | 0 | 0 |
| Pneumonia | 0 | 0 |
| Sepsis | 0 | 0 |
| Trauma | 0 | 0 |
| Shock | 0 | 0 |
| Pancreatitis | 0 | 0 |
| Others | 0 | 0 |
| APS III | 0 | 0 |
| OASIS | 0 | 0 |
| LODS | 0 | 0 |
| Heart rate (beats/min) | 1 | 0.06 |
| MAP (mmHg) | 6 | 0.36 |
| RR (times/min) | 10 | 0.59 |
| Temperature (℃) | 9 | 0.53 |
| SpO2 (%) | 0 | 0 |
| PaO2/FiO2 (mmHg) | 0 | 0 |
| PEEP (cmH2O) | 0 | 0 |
| Bicarbonate (mEqL) | 0 | 0 |
| BUN (mg/dL) | 1 | 0.06 |
| Creatinine (mg/dL) | 1 | 0.06 |
| Lactate (mmol/L) | 56 | 3.32 |
| Platelet (k/uL) | 6 | 0.36 |
| Glucose (mg/dL) | 0 | 0 |
| WBC (k/uL) | 2 | 0.12 |
| Eosinophils at day 1 (%) | 0 | 0 |
| Mechanical ventilation | 0 | 0 |
| Antibiotic | 0 | 0 |
| Vasopressor | 0 | 0 |
| CRRT | 0 | 0 |
| Glucocorticoid | 0 | 0 |
| Eosinophils on admission | 0 | 0 |
| Eosinophils on 2-3rd day | 1157 | 68.66 |
| Eosinophils on 4-5th day | 1237 | 73.41 |
| Eosinophils on 6-7th day | 891 | 52.88 |

Table S2. Subgroup analysis for the effect of baseline eosinophils on risk of mortality.

|  |  | 30-day mortality | | In-hospital mortality | |
| --- | --- | --- | --- | --- | --- |
| Variables | n | OR 95% CI | *p*-value | OR 95% CI | *p*-value |
| Hypertension |  |  |  |  |  |
| No | 949 | 0.492(0.366-0.661) | <0.001 | 0.526(0.391-0.707) | <0.001 |
| Yes | 736 | 0.475(0.334-0.675) | <0.001 | 0.485(0.340-0.692) | <0.001 |
| Coronary atherosclerosis | | | | | |
| No | 1495 | 0.487(0.383-0.619) | <0.001 | 0.509(0.400-0.648) | <0.001 |
| Yes | 190 | 0.431(0.217-0.859) | 0.017 | 0.462(0.231-0.924) | 0.029 |
| Diabetes |  |  |  |  |  |
| No | 1466 | 0.486(0.383-0.617) | <0.001 | 0.510(0.401-0.648) | <0.001 |
| Yes | 219 | 0.406(0.197-0.834) | 0.014 | 0.426(0.206-0.878) | 0.021 |
| COPD |  |  |  |  |  |
| No | 1525 | 0.453(0.358-0.574) | <0.001 | 0.471(0.371-0.598) | <0.001 |
| Yes | 160 | 0.840(0.396-1.779) | 0.648 | 0.956(0.446-2.049) | 0.907 |
| Asthma |  |  |  |  |  |
| No | 1543 | 0.478(0.378-0.603) | <0.001 | 0.502(0.397-0.635) | <0.001 |
| Yes | 142 | 0.619(0.244-1.568) | 0.312 | 0.619(0.244-1.568) | 0.312 |
| Acute kidney failure | | | | | |
| No | 807 | 0.406(0.274-0.601) | <0.001 | 0.450(0.303-0.669) | <0.001 |
| Yes | 878 | 0.594(0.446-0.790) | <0.001 | 0.606(0.455-0.807) | 0.001 |
| Tumor |  |  |  |  |  |
| No | 1339 | 0.495(0.380-0.646) | <0.001 | 0.523(0.400-0.682) | <0.001 |
| Yes | 346 | 0.490(0.313-0.768) | 0.002 | 0.506(0.322-0.795) | 0.003 |
| Antibiotic therapy on the first day of ICU admission | | | | | |
| No | 223 | 0.317(0.165-0.609) | 0.001 | 0.313(0.161-0.607) | 0.001 |
| Yes | 1462 | 0.512(0.403-0.652) | <0.001 | 0.541(0.425-0.690) | <0.001 |
| Corticosteroids therapy on the first day of ICU admission | | | | | |
| No | 1545 | 0.481(0.379-0.611) | <0.001 | 0.502(0.395-0.638) | <0.001 |
| Yes | 140 | 0.677(0.319-1.438) | 0.311 | 0.740(0.348-1.575) | 0.435 |

*p*-values were calculated by univariate logistic regression analysis.

Figure S1. Comparison of the ROC curve of the baseline eosinophils and the changes of eosinophils in the first week of ICU admission. The area under the curve (AUC) for eosinophils changes was 0.661 (95% CI: 0.637-0.683), for baseline eosinophils (categorical) was 0.590 (95% CI: 0.566-0.614), for baseline eosinophils (continuous) was 0.608 (95% CI: 0.585-0.632).
